# Supplementary material
Source: PubMed Central journal article supplement (PMC3386829)
Supplement: JCI63338sd.pdf [file JCI63338sd.pdf]

Supplemental Figure S1

A

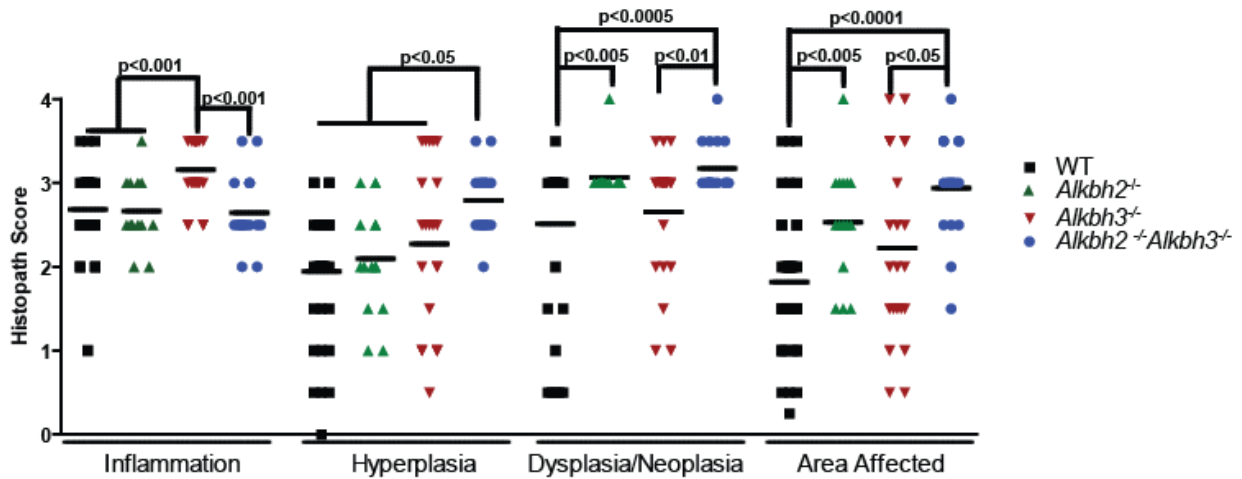

B

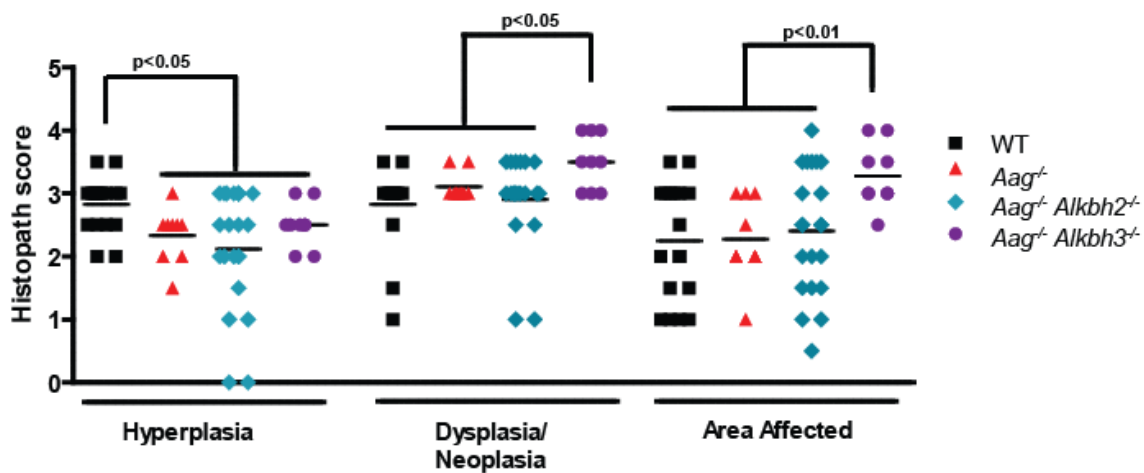

**Supplemental Figure S1. Pathology scores following AOM+DSS treatment.**

A) Pathology scores from WT (n=33), *Alkbh2*<sup>-/-</sup> (n=14), *Alkbh3*<sup>-/-</sup> (n=22) and *Alkbh2*<sup>-/-</sup>*Alkbh3*<sup>-/-</sup> (n=17) are shown for inflammation, hyperplasia, dysplasia and area affected. Each individual point represents one animal and the horizontal bar represents mean score. B) Pathology scores from WT (n=18), *Aag*<sup>-/-</sup> (n=9), *Aag*<sup>-/-</sup>*Alkbh2*<sup>-/-</sup> (n=20) and *Aag*<sup>-/-</sup>*Alkbh3*<sup>-/-</sup> (n=9) for hyperplasia, dysplasia and area affected. Each individual point represents one animal and the horizontal bar represents mean score.

## Supplemental Figure S2

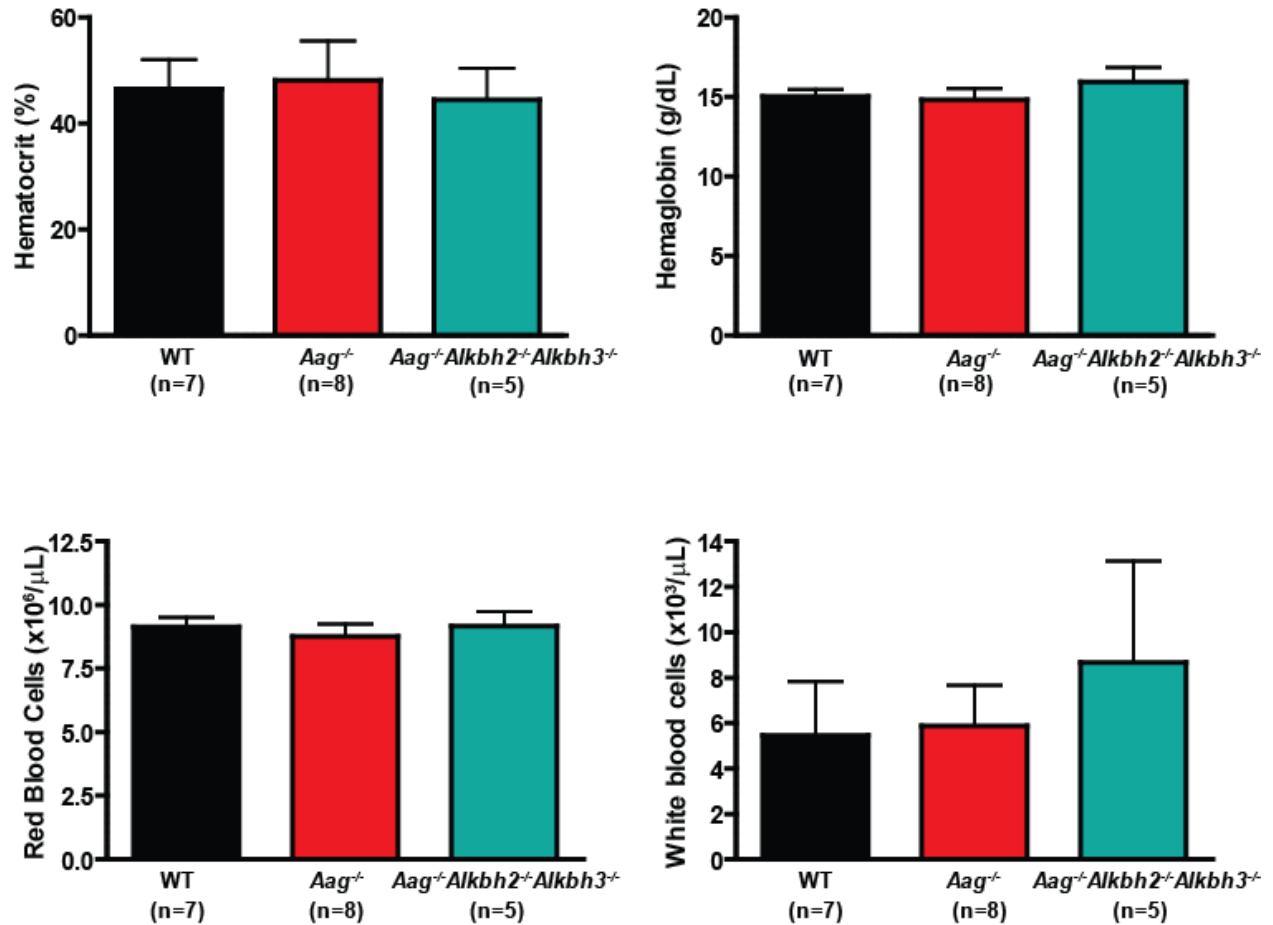

### Supplemental Figure S2. Complete blood count in WT, *Aag*<sup>-/-</sup> and *Aag*<sup>-/-</sup>*Alkbh2*<sup>-/-</sup>*Alkbh3*<sup>-/-</sup> mice following DSS treatment.

A complete blood count analysis was performed on WT (n=8), *Aag*<sup>-/-</sup> (n=7) and *Aag*<sup>-/-</sup>*Alkbh2*<sup>-/-</sup>*Alkbh3*<sup>-/-</sup> (n=5) mice illustrating the hematocrit (%), hemoglobin (g/dL), red blood cells (x10<sup>6</sup>/μl), and white blood cells (x10<sup>3</sup>/μl). Data is presented as mean ± SD.

Supplemental Table 1: Comparison of histopathological scores from WT, *Abh2*<sup>-/-</sup>, *Abh3*<sup>-/-</sup> and *Abh2*<sup>-/-</sup> *Abh3*<sup>-/-</sup> that were euthanized during and at the conclusion of the AOM+DSS treatment.

|                                                            | Inflammation | Epithelial Defects | Crypt Atrophy | Hyperplasia  | Dysplasia/ Neoplasia | Area Affected | Change in colon length (cm) | % spleen weight / BW | Number Polyps |
|------------------------------------------------------------|--------------|--------------------|---------------|--------------|----------------------|---------------|-----------------------------|----------------------|---------------|
| <b>wildtype</b>                                            |              |                    |               |              |                      |               |                             |                      |               |
| during (n=6)                                               | 2.3 ± 0.75   | 2.75 ± 0.27        | 1.16 ± 0.25   | 2.00 ± 0.55  | 2.58 ± 1.02          | 2.33 ± 0.88   | -1.26 ± 0.75                | 0.71 ± 0.43          | 9.88 ± 7.53   |
| conclusion (n=27)                                          | 2.76 ± 0.42  | 2.39 ± 0.54        | 1.22 ± 0.47   | 1.89 ± 0.85  | 2.42 ± 1.00          | 1.60 ± 0.79   | -1.89 ± 1.52                | 0.79 ± 0.35          | 6.92 ± 5.26   |
| <b><i>Abh2</i><sup>-/-</sup></b>                           |              |                    |               |              |                      |               |                             |                      |               |
| during (n=9)                                               | 2.6 ± 0.46   | 2.6 ± 0.70         | 1.5 ± 0.53    | 1.85 ± 0.63* | 3.1 ± 0.32           | 2.55 ± 0.83   | -2.05 ± 0.95                | 1.11 ± 0.47          | 12.33 ± 8.96  |
| conclusion (n=5)                                           | 2.8 ± 0.27   | 2.3 ± 0.45         | 1.2 ± 0.57    | 2.6 ± 0.42*  | 3 ± 0.0              | 2.5 ± 0.35    | -0.93 ± 1.20                | 1.11 ± 0.30          | 10.75 ± 1.5   |
| <b><i>Abh3</i><sup>-/-</sup></b>                           |              |                    |               |              |                      |               |                             |                      |               |
| during (n=9)                                               | 2.92 ± 0.38  | 2.58 ± 0.49        | 1.42 ± 1.28   | 2.00 ± 1.00  | 2.67 ± 0.52          | 2.50 ± 1.30   | -3.16 ± 0.76***             | 1.04 ± 0.76          | 11.38 ± 7.96  |
| conclusion (n=17)                                          | 3.25 ± 0.37  | 2.66 ± 0.47        | 1.34 ± 0.57   | 2.38 ± 0.96  | 2.66 ± 0.83          | 2.13 ± 1.04   | -1.57 ± 0.62***             | 1.07 ± 0.49          | 9.13 ± 4.88   |
| <b><i>Abh2</i><sup>-/-</sup> <i>Abh3</i><sup>-/-</sup></b> |              |                    |               |              |                      |               |                             |                      |               |
| during (n=8)                                               | 2.69 ± 0.46  | 2.56 ± 0.42        | 1.19 ± 0.37   | 2.63 ± 0.35  | 3.19 ± 0.26          | 3.00 ± 0.60   | -1.49 ± 0.48                | 1.73 ± 0.68          | 20.29 ± 9.43  |
| conclusion (n=9)                                           | 2.61 ± 0.42  | 2.72 ± 0.51        | 1.22 ± 0.57   | 2.94 ± 0.39  | 3.17 ± 0.35          | 2.89 ± 0.65   | -1.47 ± 0.63                | 1.41 ± 0.69          | 20.44 ± 7.20  |

Data is shown as mean ± SD. Any statistical difference between values harvested during treatment and conclusion of treatment are indicated as \* p<0.05, \*\* p<0.01, \*\*\* p<0.001.

Supplemental Table 2: Comparison of histopathological scores from WT, *Aag*<sup>-/-</sup>, *Aag*<sup>-/-</sup> *Abh2*<sup>-/-</sup>, and *Aag*<sup>-/-</sup> *Abh3*<sup>-/-</sup> that were euthanized during and at the conclusion of the AOM+DSS treatment.

|                                                      | Inflammation | Epithelial Defects | Crypt Atrophy | Hyperplasia | Dysplasia/ Neoplasia | Area Affected | Change in colon length | % spleen weight / BW | Polyps        |
|------------------------------------------------------|--------------|--------------------|---------------|-------------|----------------------|---------------|------------------------|----------------------|---------------|
| wildtype                                             |              |                    |               |             |                      |               |                        |                      |               |
| during (n=0)                                         | n.a.         | n.a.               | n.a.          | n.a.        | n.a.                 | n.a.          | n.a.                   | n.a.                 | n.a.          |
| conclusion (n=18)                                    | 2.86 ± 0.54  | 2.44 ± 0.45        | 1.472 ± 0.72  | 2.83 ± 0.42 | 2.83 ± 0.62          | 2.25 ± 0.91   | -0.63 ± 0.71           | 0.97 ± 0.82          | 7.67 ± 3.18   |
| <i>Aag</i> <sup>-/-</sup>                            |              |                    |               |             |                      |               |                        |                      |               |
| during (n=7)                                         | 2.64 ± 0.38  | 2.57 ± 0.35        | 1.29 ± 0.64   | 2.29 ± 0.49 | 3.14 ± 0.24          | 2.29 ± 0.76   | -2.06 ± 0.31           | 0.85 ± 0.65          | 21.43 ± 9.88  |
| conclusion (n=2)                                     | 2.0 ± 0.0    | 2.0 ± 0.0          | 0.75 ± 0.35   | 2.5 ± 0.0   | 3.0 ± 0.0            | 2.25 ± 0.35   | -1.45 ± 1.06           | 1.14 ± 0.25          | 18.50 ± 2.12  |
| <i>Aag</i> <sup>-/-</sup> <i>Abh2</i> <sup>-/-</sup> |              |                    |               |             |                      |               |                        |                      |               |
| during (n=7)                                         | 2.42 ± 0.57  | 2.62 ± 0.51**      | 1.23 ± 0.75   | 2.08 ± 0.98 | 3.00 ± 0.68          | 2.73 ± 0.95   | -2.15 ± 0.72           | 0.72 ± 0.39*         | 23.00 ± 11.98 |
| conclusion (n=13)                                    | 2.71 ± 0.39  | 2.07 ± 0.35**      | 1.36 ± 0.56   | 2.50 ± 0.41 | 3.00 ± 0.29          | 2.00 ± 0.87   | -2.01 ± 0.43           | 1.21 ± 0.28*         | 21.57 ± 9.50  |
| <i>Aag</i> <sup>-/-</sup> <i>Abh3</i> <sup>-/-</sup> |              |                    |               |             |                      |               |                        |                      |               |
| during (n=5)                                         | 2.75 ± 0.50  | 2.38 ± 0.48        | 0.63 ± 0.25** | 2.50 ± 0.41 | 3.38 ± 0.48          | 3.38 ± 0.48   | -1.78 ± 0.83           | 1.65 ± 0.73          | 23.25 ± 9.74  |
| conclusion (n=4)                                     | 3.10 ± 0.42  | 3.00 ± 0.35        | 1.80 ± 0.57** | 2.50 ± 0.35 | 3.60 ± 0.42          | 3.2 ± 0.57    | -2.14 ± 0.48           | 0.85 ± 0.41          | 11.80 ± 10.54 |

n.a. (not applicable) indicates all mice survived the AOM+DSS treatment. Data is shown as mean ± SD. Any statistical differences between values during treatment and conclusion of treatment are indicated as \* p<0.05, \*\* p<0.01, \*\*\* p<0.001.
